# Supplementary material
Source: HighWire-hosted journal article supplement (https://jnm.snmjournals.org/highwire/filestream/94362/field_highwire_adjunct_files/0/108233_Supplemental_Data.pdf)
Supplement: 108233_Supplemental_Data.pdf [file 108233_Supplemental_Data.pdf]

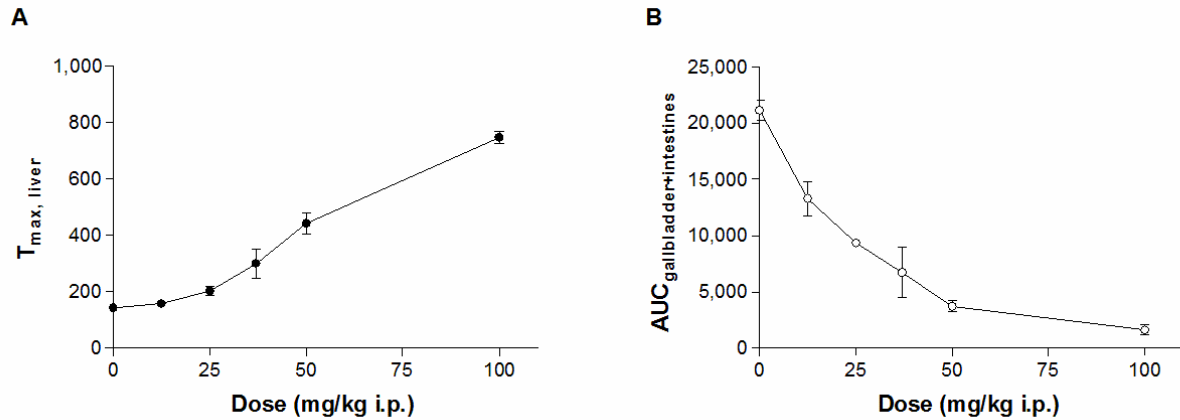

**SUPPLEMENTAL FIGURE 1** Dose response curves of rifampicin. In order to investigate if mild alterations can be detected with the proposed method, we administered 5 different rifampicin doses (100 mg/kg IP + 25 mg/kg IV; 50 mg/kg IP + 12.5 mg/kg IV; 37.5 mg/kg IP + 9.37 mg/kg IV; 25 mg/kg IP + 6.25 mg/kg IV; 12.5 mg/kg IP + 3.12 mg/kg IV), or vehicle in wild type mice ( $n=3$  for each dose), to obtain a dose response curve. Time activity curves of the liver and gallbladder+intestines were obtained after  $\mu$ SPECT scanning.  $T_{max, liver}$  (i.e. the time point when  $C_{max}$  was reached) and  $AUC_{gallbladder+intestines}$  were consequently determined.  $T_{max, liver}$ , (A) and  $AUC_{gallbladder+intestines}$  (B) are expressed in function of the administered dose (only the i.p. dose is displayed. Note that 1h after each i.p. dose, a second i.v. dose was given (co-injected with  $^{99m}Tc$ -mebrofenin)). The curves demonstrate a dose-dependent effect on the uptake and efflux of  $^{99m}Tc$ -mebrofenin. Higher doses of rifampicin delayed  $T_{max, liver}$  and caused a smaller  $AUC_{gallbladder+intestines}$ , representing decreases in hepatic uptake and in efflux to the gallbladder and intestines, respectively.
